# Supplementary material for: Prenatal Ethanol Exposure Misregulates Genes Involved in Iron Homeostasis Promoting a Maladaptation of Iron Dependent Hippocampal Synaptic Transmission and Plasticity
Source: PubMed Central journal article supplement (PMC6855190; doi:10.3389/fphar.2019.01312), 2019-11-07
Supplement: DataSheet_1.pdf [file DataSheet_1.pdf]

# WESTERN BLOT ANTI-DMT1 IN HIPPOCAMPUS

Control Samples (C), PAE samples (Ethanol, E)

**BLOT1**

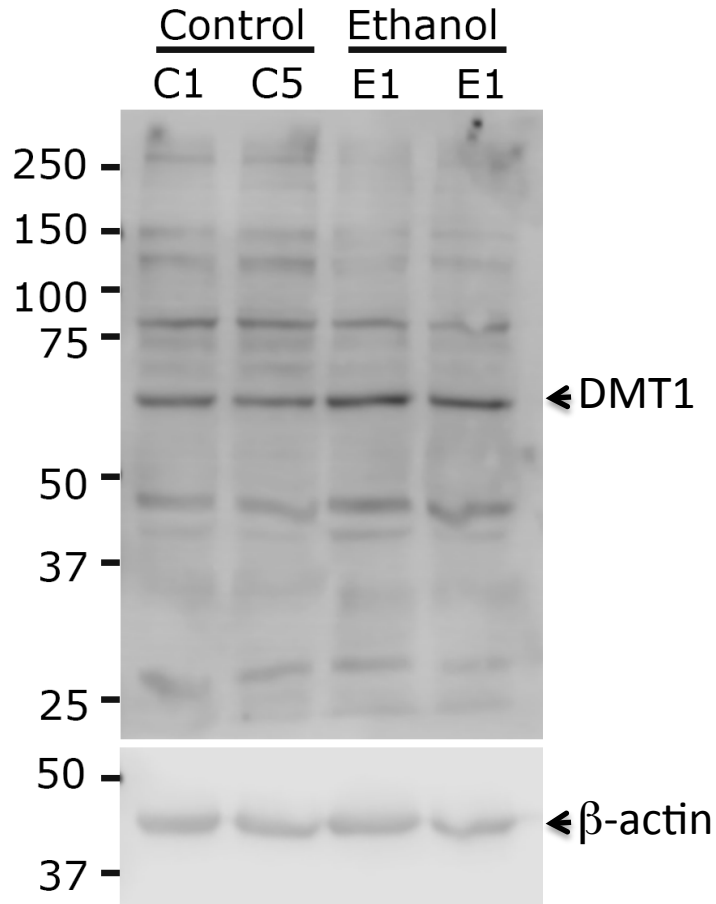

**BLOT2**

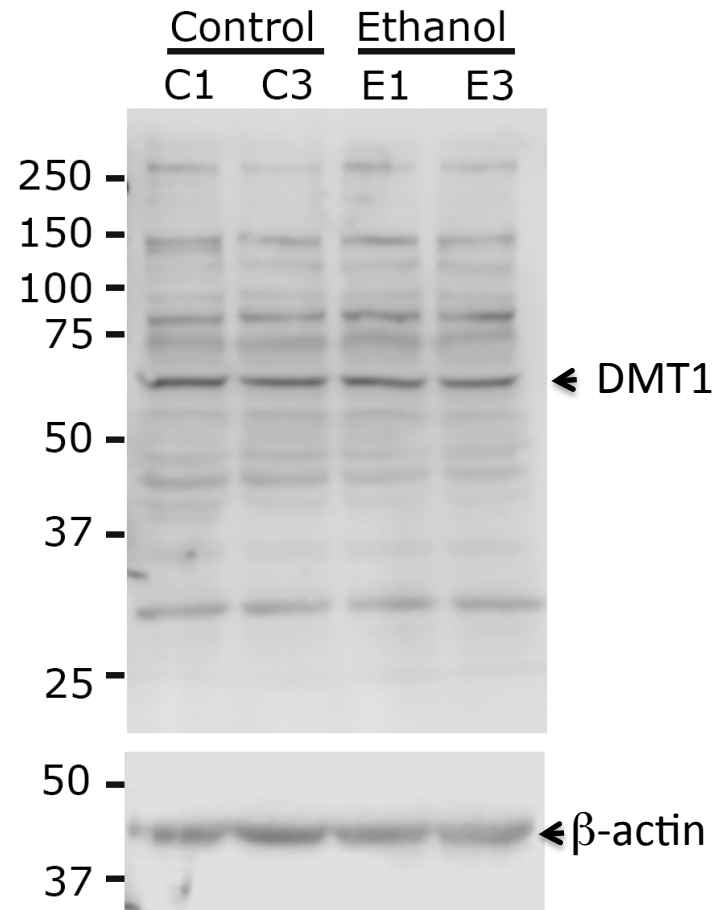

Hippocampus, control samples n=4, PAE samples n=4

# WESTERN BLOT ANTI-DMT1 IN PREFRONTAL CORTEX (PFC) AND VENTRAL TEGMENTAL AREA (VTA)

Control Samples (C), PAE samples (E)

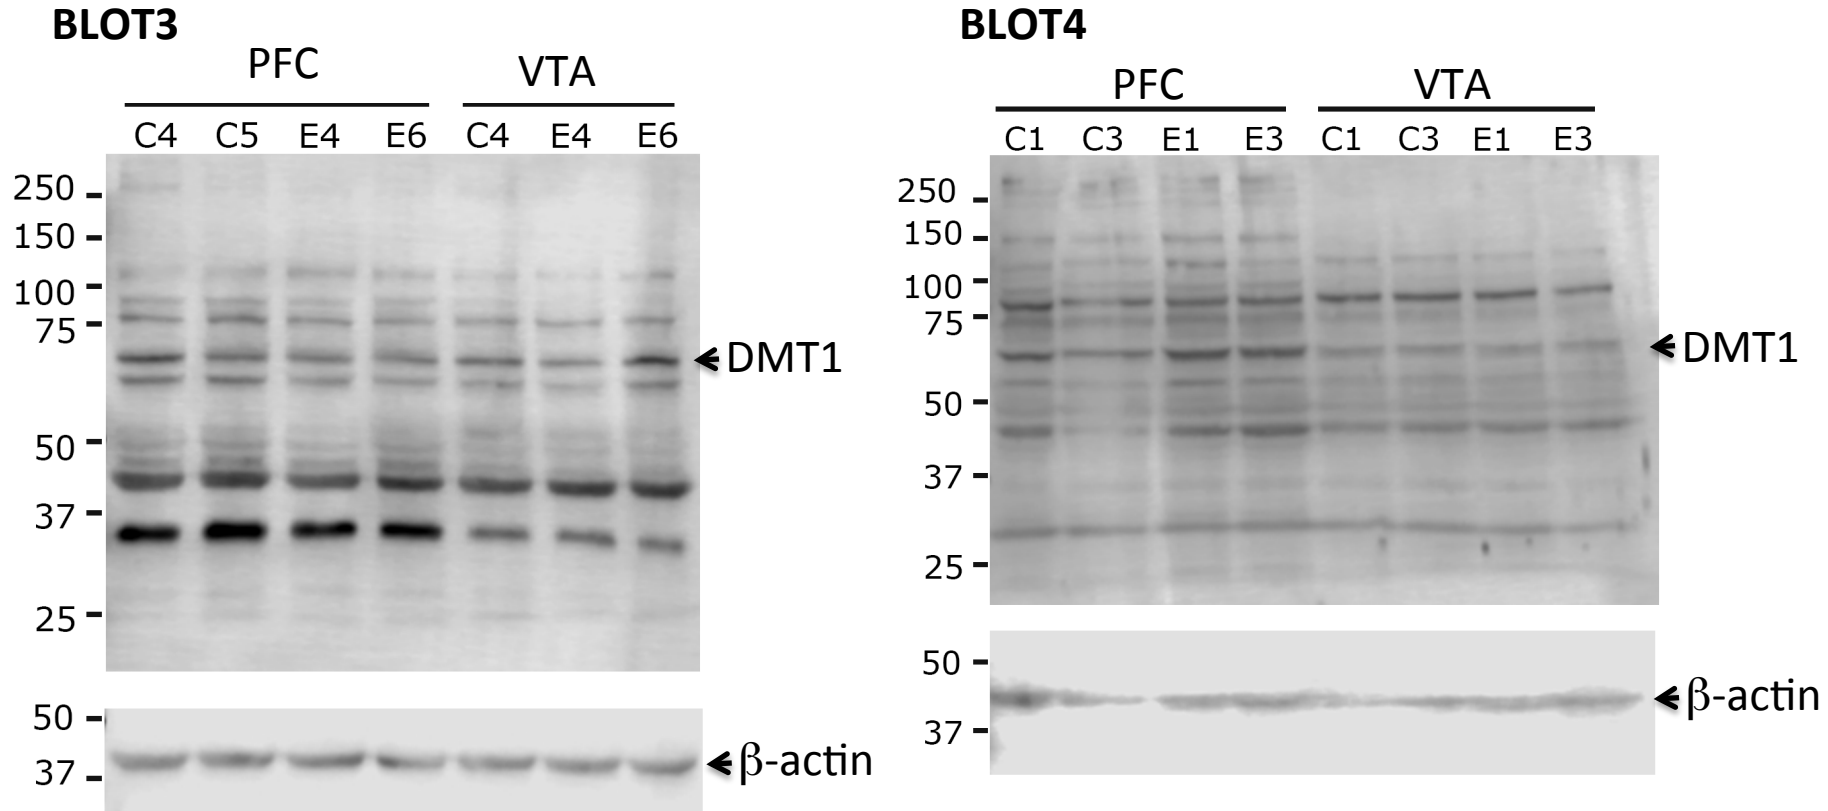

PFC, control samples n=4, PAE samples n=4  
VTA, control samples n=3, PAE samples n=4

# WESTERN BLOT ANTI-DMT1 IN PREFRONTAL CORTEX (PFC) AND (VENTRAL TEGMENTAL AREA) VTA

Control Samples (C), PAE samples (E)

## BLOT5

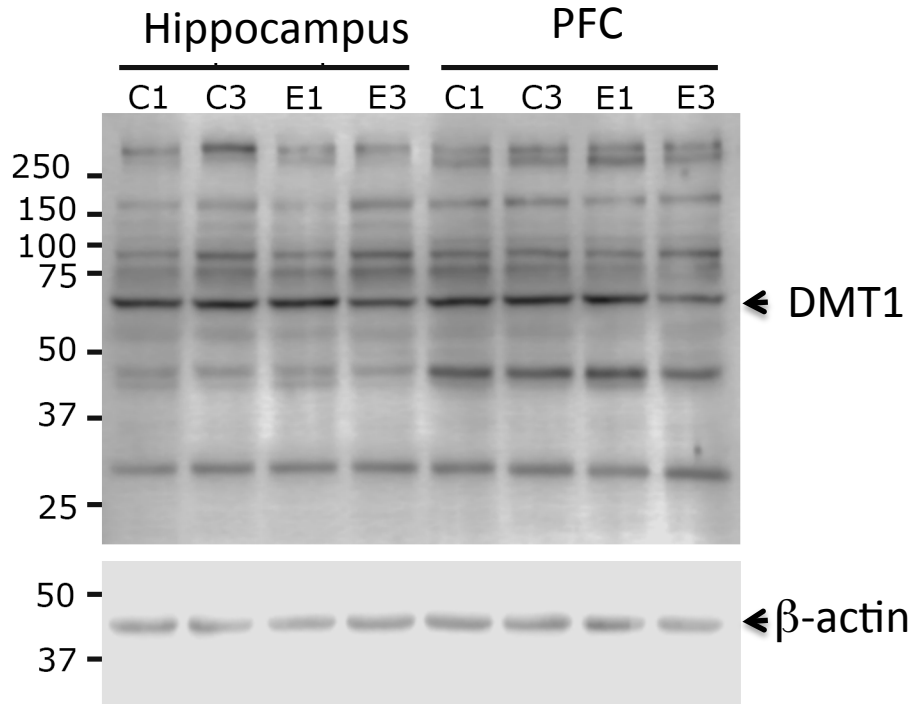

## BLOT6

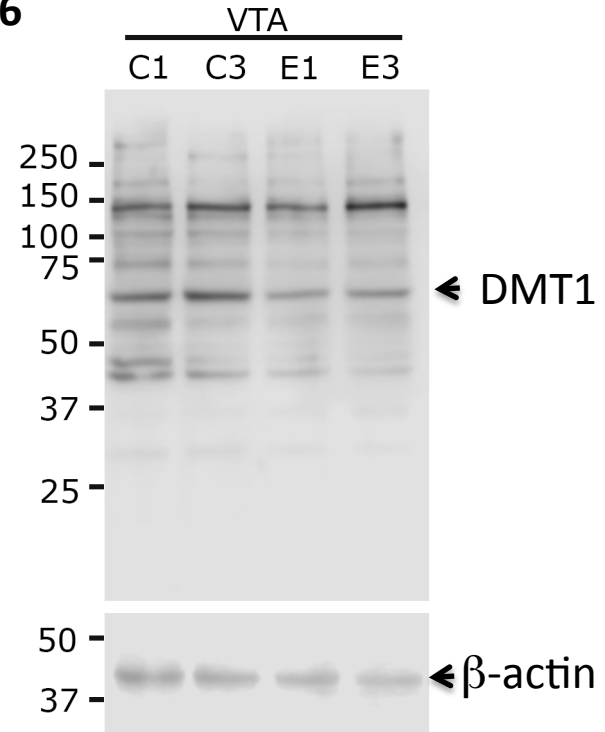

Hippocampus, control samples n=2, PAE samples ethanol n=2.  
PFC, control samples n=2, PAE samples n=2.  
VTA, control samples n=2, PAE samples n=2.

# WESTERN BLOT ANTI-TfR HIPPOCAMPUS

Control Samples (C), PAE Samples (E)

## BLOT 7

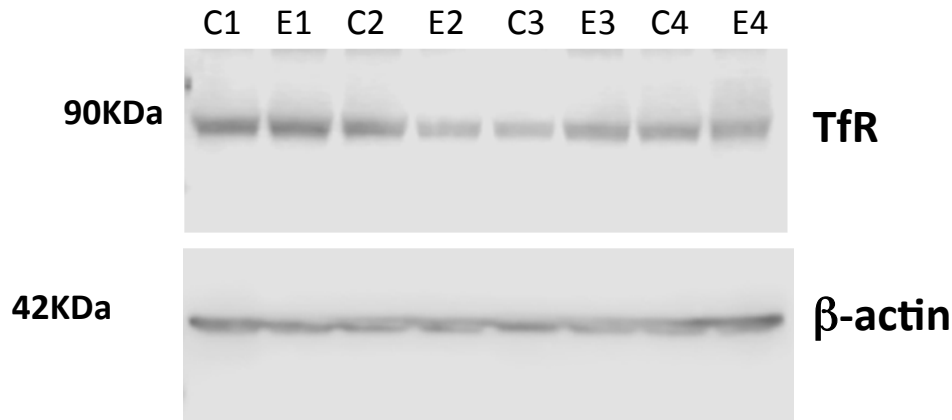

## BLOT 8

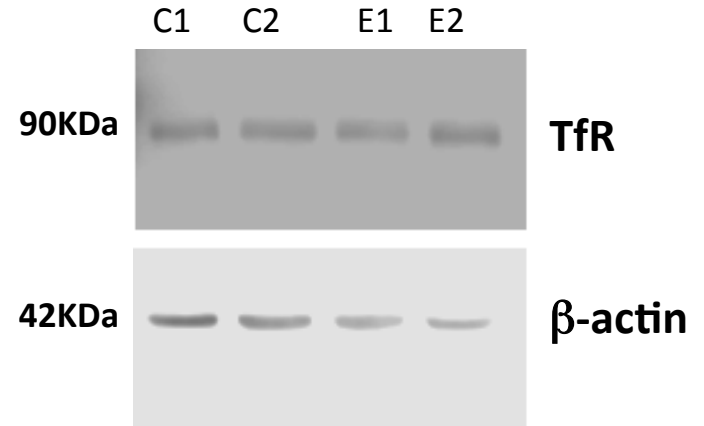

Hippocampus, control samples n=6, PAE samples n=6
